# Supplementary material
Source: PubMed Central journal article supplement (PMC4443369)
Supplement: pnas.201500014SI.pdf [file pnas.201500014SI.pdf]

# Supporting Information

Marek and Moore 10.1073/pnas.150014112

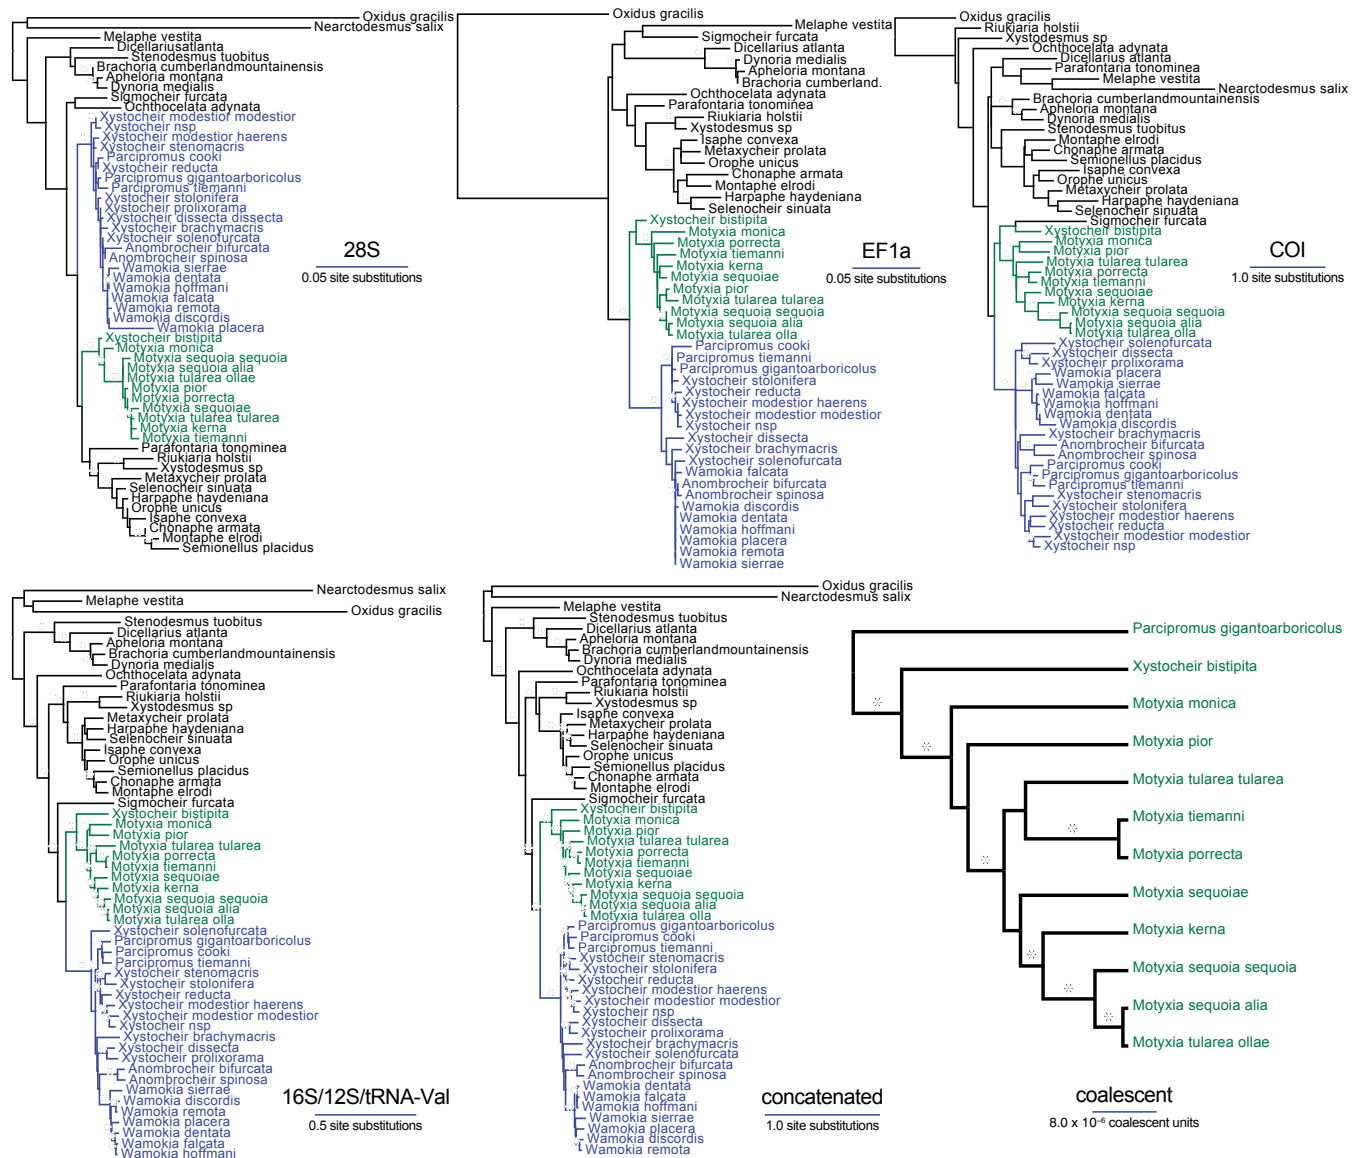

Fig. S1. Separate gene histories for the loci concatenated in Fig. S4 analyzed in RAXML and the *Motyxia* species phylogeny from the multispecies coalescent model in \*BEAST. (Scale bar, expected substitutions per site.) Branch lengths of \*BEAST tree are shown in coalescent units. Asterisks denote bootstrap/posterior probability support values  $\geq 70\%$ . [Nuclear: elongation factor-1 alpha (EF1-a); 28S ribosomal RNA (28S); mitochondrial: small subunit ribosomal RNA (16S/12S/tRNA-Val); and cytochrome c oxidase subunit I (COI)].





**Table S1. Taxa sampled**

| Tribe                         | Species                                  | Specimen no. | 12S–16S  | EF1a     | 28S      | COI      |
|-------------------------------|------------------------------------------|--------------|----------|----------|----------|----------|
| Xystocheirini                 | <i>Anombrocheir bifurcata</i>            | MTX0174      | JN383854 | JN383878 | KR135885 | KR135987 |
|                               | <i>Anombrocheir spinosa</i>              | MTX0180      | JN383855 | JN383879 | KR135886 | KR135988 |
|                               | <i>Motyxia kerna</i>                     | MTX0129      | JN383849 | JN383874 | KR135897 | KR135999 |
|                               | <i>Motyxia monica</i>                    | MTX0008      | JN383871 | JN383847 | KR135898 | KR136000 |
|                               | <i>Motyxia pior</i>                      | MTX0022      | JN383848 | JN383872 | KR135899 | KR136001 |
|                               | <i>Motyxia porrecta</i>                  | MTX0006/253  | JN383851 | JN383877 | KR135938 | KR136002 |
|                               | <i>Motyxia sequoia alia</i>              | MTX0242      | KR135952 | KR136052 | KR135900 | KR136003 |
|                               | <i>Motyxia sequoia sequoia</i>           | MTX0249      | KR135954 | KR136054 | KR135902 | KR136005 |
|                               | <i>Motyxia sequoiae</i>                  | JN383850     | JN383850 | JN383875 | KR135901 | KR136004 |
|                               | <i>Motyxia tiemanni</i>                  | MTX0011      | JN383852 | JN383876 | KR135903 | KR136006 |
|                               | <i>Motyxia tularea ollae</i>             | MTX0228      | KR135955 | KR136055 | KR135904 | KR136007 |
|                               | <i>Motyxia tularea tularea</i>           | MTX0033      | JN383853 | JN383873 | KR135905 | KR136008 |
|                               | <i>Parcipromus cooki</i>                 | MTX0431      | KR135961 | KR136060 | KR135911 | KR136014 |
|                               | <i>Parcipromus giganteoarboreolus</i>    | MTX0021      | JN383856 | JN383882 | KR135912 | KR136015 |
|                               | <i>Parcipromus tiemanni</i>              | MTX0040      | JN383857 | JN383883 | KR135913 | KR136016 |
|                               | <i>Wamokia dentata</i>                   | MTX0334      | KR135968 | KR136065 | KR135919 | KR136022 |
|                               | <i>Wamokia discordis</i>                 | MTX0335      | KR135969 | KR136066 | KR135920 | KR136023 |
|                               | <i>Wamokia falcata</i>                   | MTX0329      | KR135970 | KR136067 | KR135921 | KR136024 |
|                               | <i>Wamokia hoffmani</i>                  | MTX0183/324  | JN383859 | JN383880 | KR135922 | KR136025 |
|                               | <i>Wamokia placera</i>                   | MTX0340      | KR135971 | KR136068 | KR135923 | KR136026 |
|                               | <i>Wamokia remota</i>                    | MTX0313      | KR135972 | KR136069 | KR135924 | —        |
|                               | <i>Wamokia sierrae</i>                   | MTX0303      | KR135973 | KR136070 | KR135925 | KR136027 |
|                               | <i>Xystocheir bistipita</i>              | MTX0452      | KR135976 | KR136073 | KR135926 | KR136030 |
|                               | <i>Xystocheir brachymacris</i>           | MTX0182      | JN383860 | JN383881 | KR135927 | KR136031 |
|                               | <i>Xystocheir dissecta dissecta</i>      | MTX0437      | KR135977 | KR136074 | KR135928 | KR136032 |
|                               | <i>Xystocheir modestior haerens</i>      | MTX0381      | KR135978 | KR136075 | KR135929 | KR136033 |
|                               | <i>Xystocheir modestior modestior</i>    | MTX0371      | KR135979 | KR136076 | KR135930 | KR136034 |
|                               | <i>Xystocheir Sierra</i>                 | MTX0395      | KR135980 | KR136077 | KR135931 | KR136035 |
|                               | <i>Xystocheir prolixorama</i>            | MTX0442      | KR135981 | —        | KR135932 | KR136036 |
|                               | <i>Xystocheir reducta</i>                | MTX0407      | KR135982 | KR136078 | KR135933 | KR136037 |
|                               | <i>Xystocheir solenofurcata</i>          | MTX0308      | KR135983 | KR136079 | KR135934 | KR136038 |
| <i>Xystocheir stenomacris</i> | MTX0396                                  | KR135984     | —        | KR135935 | KR136039 |          |
| <i>Xystocheir stolonifera</i> | MTX0383                                  | KR135985     | KR136080 | KR135936 | KR136040 |          |
| Sigmocheirini                 | <i>Ochthocelata adynata</i>              | MTX0152      | JN383846 | JN383885 | KR135907 | KR136010 |
|                               | <i>Sigmocheir furcata</i>                | MTX0367      | KR135966 | KR136064 | KR135917 | KR136020 |
| Orophini                      | <i>Orophe unicus</i>                     | MTX0126      | JN383865 | JN383868 | KR135908 | KR136011 |
| Xystodesmini                  | <i>Harpaphe haydeniana haydeniana</i>    | MTX0137      | JN383862 | JN383870 | KR135892 | KR135994 |
|                               | <i>Isaphe convexa</i>                    | MTX0106      | JN383863 | JN383869 | KR135893 | KR135995 |
|                               | <i>Riukiaria holstii</i>                 | MTX0191      | KR135963 | KR136062 | KR135914 | KR136017 |
|                               | <i>Semionellus placidus</i>              | MTX0460      | KR135965 | —        | KR135916 | KR136019 |
|                               | <i>Xystodesmus</i> sp.                   | MTX0186      | KR135986 | KR136081 | KR135937 | KR136041 |
|                               | <i>Xystodesmus</i> sp.                   | MTX0097      | JN383861 | JN383866 | KR135889 | KR135991 |
| Chonaphini                    | <i>Chonaphe armata</i>                   | MTX0097      | JN383861 | JN383866 | KR135889 | KR135991 |
|                               | <i>Metaxycheir prolata</i>               | MTX0107      | KR135949 | KR136047 | KR135895 | KR135997 |
|                               | <i>Montaphe elrodi</i>                   | MTX0083      | KR135950 | KR136048 | KR135896 | KR135998 |
|                               | <i>Selenocheir sinuata</i>               | MTX0319      | KR135964 | KR136063 | KR135915 | KR136018 |
| Rhysodesmini                  | <i>Stenodesmus tuobitus</i>              | MTX0199      | KR135967 | —        | KR135918 | KR136021 |
| Apheloriini                   | <i>Apheloria montana</i>                 | SPC000134    | DQ490660 | KR136042 | KR135887 | KR135989 |
|                               | <i>Brachoria cumberlandmountainensis</i> | SPC000651    | EU127864 | KR136043 | KR135888 | KR135990 |
|                               | <i>Dynoria medialis</i>                  | SPC000431    | DQ490700 | KR136045 | KR135891 | KR135993 |
| Pachydesmini                  | <i>Dicellarius atlanta</i>               | SPC000428    | DQ490648 | KR136044 | KR135890 | KR135992 |
| Melaphinae                    | <i>Melaphe vestita</i>                   | MEL1         | KR135948 | KR136046 | KR135894 | KR135996 |
| Parafontariinae               | <i>Parafontaria tonominea</i>            | MTX0189      | KR135960 | KR136059 | KR135910 | KR136013 |
| Trichopolydesmidae            | <i>Nearctodesmus salix</i>               | MTX0215      | KR135958 | —        | KR135906 | KR136009 |
| Paradoxosomatidae             | <i>Oxidus gracilis</i>                   | MTX0216      | KR135959 | KR136058 | KR135909 | KR136012 |

—, denotes missing data.
